# Supplementary material for: Effect of anions on architectures of transition metal complexes with 1,4-bis(1,2,4-triazol-1-yl)butane
Source: Royal Society of Chemistry journal article supplement (doi:10.1039/c1ce05491k), 2011-01-01
Supplement: c1ce05491k.pdf [file c1ce05491k.pdf]

Supplementary Information

Table S1 Select bond distance (Å) and angle (°) for the complexes **1-10**

Select bond distances (Å) and angles (°) for **1**

---

|                      |            |                     |            |
|----------------------|------------|---------------------|------------|
| Cu(1)-N(1)           | 1.9997(17) | Cu(1)-N(1)#2        | 1.9997(17) |
| Cu(1)-Cl(1)          | 2.2954(5)  | Cu(1)-Cl(1)#2       | 2.2954(5)  |
| N(1)-Cu(1)-N(1)#2    | 180.00(9)  | N(1)-Cu(1)-Cl(1)#2  | 89.80(5)   |
| N(1)#2-Cu(1)-Cl(1)#2 | 90.20(5)   | N(1)-Cu(1)-Cl(1)    | 90.20(5)   |
| N(1)#2-Cu(1)-Cl(1)   | 89.80(5)   | Cl(1)#2-Cu(1)-Cl(1) | 180.0      |

Symmetry transformations used to generate equivalent atoms: #2 2-x, 1-y, -z

Select bond distances (Å) and angles (°) for **2**

---

|                     |          |                     |          |
|---------------------|----------|---------------------|----------|
| Cu(1)-N(1)          | 2.009(2) | Cu(1)-N(1)#1        | 2.009(2) |
| Cu(1)-N(6)#2        | 2.045(2) | Cu(1)-N(6)#3        | 2.045(2) |
| N(1)-Cu(1)-N(1)#1   | 180.0    | N(1)-Cu(1)-N(6)#2   | 90.92(8) |
| N(1)#1-Cu(1)-N(6)#2 | 89.08(8) | N(1)-Cu(1)-N(6)#3   | 89.08(8) |
| N(1)#1-Cu(1)-N(6)#3 | 90.92(8) | N(6)#2-Cu(1)-N(6)#3 | 180.0    |

Symmetry transformations used to generate equivalent atoms: #1 -x, 1-y, 1-z; #2 -1+x, 1/2-y, 1/2+z; #3 1-x, 1/2+y, 1/2-z

Select bond distances (Å) and angles (°) for **3**

---

|                     |            |                     |            |
|---------------------|------------|---------------------|------------|
| Cu(1)-N(1)          | 2.014(2)   | Cu(1)-N(1)#1        | 2.0141(19) |
| Cu(1)-N(1)#2        | 2.014(2)   | Cu(1)-N(1)#3        | 2.0141(19) |
| Cu(1)-O(5)          | 2.423(3)   | Cu(1)-O(5)#3        | 2.423(3)   |
| N(1)-Cu(1)-N(1)#1   | 175.55(11) | N(1)-Cu(1)-N(1)#2   | 90.00(12)  |
| N(1)#1-Cu(1)-N(1)#2 | 90.18(12)  | N(1)-Cu(1)-N(1)#3   | 90.18(12)  |
| N(1)#1-Cu(1)-N(1)#3 | 90.00(12)  | N(1)#2-Cu(1)-N(1)#3 | 175.55(11) |

|                     |          |                     |          |
|---------------------|----------|---------------------|----------|
| N(1)-Cu(1)-O(5)     | 92.22(5) | N(1)#1-Cu(1)-O(5)   | 92.22(5) |
| N(1)#2-Cu(1)-O(5)   | 87.78(5) | N(1)#3-Cu(1)-O(5)   | 87.78(5) |
| N(1)-Cu(1)-O(5)#3   | 87.78(5) | N(1)#1-Cu(1)-O(5)#3 | 87.78(5) |
| N(1)#2-Cu(1)-O(5)#3 | 92.22(5) | N(1)#3-Cu(1)-O(5)#3 | 92.22(5) |
| O(5)-Cu(1)-O(5)#3   | 180.0    |                     |          |

Symmetry transformations used to generate equivalent atoms: #1 5/4-x, y, 5/4-z; #2 x, 5/4-y, 5/4-z; #3 5/4-x, 5/4-y, z

Select bond distances (Å) and angles (°) for **4**

|                   |            |                   |            |
|-------------------|------------|-------------------|------------|
| Cu(1)-O(3)        | 1.961(3)   | Cu(1)-O(1)        | 1.964(3)   |
| Cu(1)-O(4)        | 1.974(2)   | Cu(1)-O(2)#1      | 1.977(3)   |
| Cu(1)-N(1)        | 2.156(3)   |                   |            |
| O(3)-Cu(1)-O(1)   | 89.78(12)  | O(3)-Cu(1)-O(4)   | 168.18(10) |
| O(1)-Cu(1)-O(4)   | 88.11(11)  | O(3)-Cu(1)-O(2)#1 | 89.89(12)  |
| O(1)-Cu(1)-O(2)#1 | 167.92(11) | O(4)-Cu(1)-O(2)#1 | 89.75(12)  |
| O(3)-Cu(1)-N(1)   | 100.52(11) | O(1)-Cu(1)-N(1)   | 98.90(12)  |
| O(4)-Cu(1)-N(1)   | 91.30(11)  | O(2)#1-Cu(1)-N(1) | 93.03(12)  |

Symmetry transformations used to generate equivalent atoms: #1 -x, 1-y, 1-z

Select bond distances (Å) and angles (°) for **5**

|                   |           |                     |            |
|-------------------|-----------|---------------------|------------|
| Ni(1)-N(1)        | 2.065(3)  | Ni(1)-O(1)          | 2.056(4)   |
| Ni(1)-N(1)#2      | 2.065(3)  | Ni(1)-O(3)          | 2.086(4)   |
| Ni(1)-O(2)        | 2.102(3)  | Ni(1)-O(2)#2        | 2.102(3)   |
| O(1)-Ni(1)-N(1)#2 | 91.48(12) | O(1)-Ni(1)-N(1)     | 91.48(12)  |
| N(1)#2-Ni(1)-N(1) | 95.11(19) | O(1)-Ni(1)-O(3)     | 172.74(16) |
| N(1)#2-Ni(1)-O(3) | 93.41(12) | N(1)-Ni(1)-O(3)     | 93.41(12)  |
| O(1)-Ni(1)-O(2)   | 85.56(12) | N(1)#2-Ni(1)-O(2)   | 176.64(12) |
| N(1)-Ni(1)-O(2)   | 86.58(13) | O(3)-Ni(1)-O(2)     | 89.38(11)  |
| O(1)-Ni(1)-O(2)#2 | 85.56(12) | N(1)#2-Ni(1)-O(2)#2 | 86.58(13)  |

N(1)-Ni(1)-O(2)#2      176.64(12)    O(3)-Ni(1)-O(2)#2      89.38(11)  
 O(2)-Ni(1)-O(2)#2      91.59(17)

Symmetry transformations used to generate equivalent atoms: #2 x, 3/2-y, z

Select bond distances (Å) and angles (°) for **6**

|                      |            |                       |            |
|----------------------|------------|-----------------------|------------|
| Ni(1)-N(1)           | 2.1249(17) | Ni (1)-N(1) #2        | 2.1249(17) |
| Ni (1)-N(1)#3        | 2.1249(17) | Ni (1)-N(6)#4         | 2.1103(17) |
| Ni (1)- N(6)#5       | 2.1104(17) | Ni (1)- N(6)#6        | 2.1104(17) |
| Ni (2)-N(7)          | 2.1033(18) | Ni (2)-N(7)#7         | 2.1033(18) |
| Ni (2)-N(7)#8        | 2.1034(18) | Ni (2)-N(7)#9         | 2.1034(18) |
| Ni (2)- N(7)#10      | 2.1034(18) | Ni (2)- N(7)#11       | 2.1034(18) |
|                      |            |                       |            |
| N(6)#4-Ni(1)-N(6)#5  | 90.77(7)   | N(6)#4-Ni(1)-N(6)#6   | 90.77(7)   |
| N(6)#5-Ni(1)-N(6)#6  | 90.77(7)   | N(6)#4-Ni(1)-N(1)#2   | 88.65(7)   |
| N(6)#5-Ni(1)-N(1)#2  | 177.77(6)  | N(6)#6-Ni(1)-N(1)#2   | 91.39(6)   |
| N(6)#4-Ni(1)-N(1)#3  | 91.39(6)   | N(6)#5-Ni(1)-N(1)#3   | 88.66(7)   |
| N(6)#6-Ni(1)-N(1)#3  | 177.77(6)  | N(6)#4-Ni(1)-N(1)     | 177.76(6)  |
| N(6)#5-Ni(1)-N(1)    | 91.39(6)   | N(6)#6-Ni(1)-N(1)     | 88.65(7)   |
| N(1)#2-Ni(1)-N(1)#3  | 89.20(7)   | N(1)#2-Ni(1)-N(1)     | 89.21(7)   |
| N(1)#3-Ni(1)-N(1)    | 89.21(7)   | N(7)#8-Ni(2)-N(7)#9   | 180.0      |
| N(7)#8-Ni(2)-N(7)#7  | 91.45(7)   | N(7)#9-Ni(2)-N(7)#7   | 88.55(7)   |
| N(7)#8-Ni(2)-N(7)    | 88.55(7)   | N(7)#9-Ni(2)-N(7)     | 91.45(7)   |
| N(7)#7-Ni(2)-N(7)    | 180.0      | N(7)#8-Ni(2)-N(7)#11  | 91.45(7)   |
| N(7)#9-Ni(2)-N(7)#11 | 88.55(7)   | N(7)#7-Ni(2)-N(7)#11  | 88.55(7)   |
| N(7)-Ni(2)-N(7)#11   | 91.45(7)   | N(7)#8-Ni(2)-N(7)#10  | 88.55(7)   |
| N(7)#9-Ni(2)-N(7)#10 | 91.45(7)   | N(7)#7-Ni(2)-N(7)#10  | 91.45(7)   |
| N(7)-Ni(2)-N(7)#10   | 88.55(7)   | N(7)#11-Ni(2)-N(7)#10 | 180.00(8)  |

Symmetry transformations used to generate equivalent atoms : #2 -y+1, x-y+1, z; #3 -x+y, -x+1, z;  
 #4 x+1/3, y+2/3, z-1/3; #5 -y+1/3, x-y+2/3, z-1/3; #6 -x+y+1/3, -x+2/3, z-1/3; #7 -x, -y, -z; #8 -y,  
 x-y, z; #9 y, -x+y, -z; #10 -x+y, -x, z; #11 x-y, x, -z.

Select bond distances (Å) and angles (°) for **7**

|                     |            |                     |            |
|---------------------|------------|---------------------|------------|
| Ni(1)-N(1)#4        | 2.1043(13) | Ni(1)-N(1)#5        | 2.1043(13) |
| Ni(1)-N(1)#6        | 2.1043(13) | Ni(1)-N(1)#7        | 2.1043(13) |
| Ni(1)-N(1)#8        | 2.1043(13) | Ni(1)-N(1)          | 2.1043(13) |
| N(1)#4-Ni(1)-N(1)   | 180.00(9)  | N(1)#4-Ni(1)-N(1)#5 | 89.87(5)   |
| N(1)-Ni(1)-N(1)#5   | 90.13(5)   | N(1)#4-Ni(1)-N(1)#6 | 90.13(5)   |
| N(1)-Ni(1)-N(1)#6   | 89.87(5)   | N(1)#5-Ni(1)-N(1)#6 | 90.13(5)   |
| N(1)#4-Ni(1)-N(1)#7 | 90.13(5)   | N(1)-Ni(1)-N(1)#7   | 89.87(5)   |
| N(1)#5-Ni(1)-N(1)#7 | 180.00(8)  | N(1)#6-Ni(1)-N(1)#7 | 89.87(5)   |
| N(1)#4-Ni(1)-N(1)#8 | 89.87(5)   | N(1)-Ni(1)-N(1)#8   | 90.13(5)   |
| N(1)#5-Ni(1)-N(1)#8 | 89.87(5)   | N(1)#6-Ni(1)-N(1)#8 | 180.00(13) |
| N(1)#7-Ni(1)-N(1)#8 | 90.13(5)   |                     |            |

Symmetry transformations used to generate equivalent atoms : #4 -x, -y -z; #5 x-y, x, -z; #6 -y, x-y, z; #7 -x+y, -x, z; #8 y, -x+y, -z.

Select bond distances (Å) and angles (°) for **8**

|                     |            |                   |            |
|---------------------|------------|-------------------|------------|
| Co(1)-O(5)          | 2.070(2)   | Co(1)-O(1)        | 2.107(2)   |
| Co(1)-N(1)#2        | 2.107(2)   | Co(1)-N(1)        | 2.107(2)   |
| Co(1)-O(4)#2        | 2.1375(18) | Co(1)-O(4)        | 2.1375(18) |
| O(5)-Co(1)-O(1)     | 172.20(10) | O(5)-Co(1)-N(1)#2 | 91.59(7)   |
| O(1)-Co(1)-N(1)#2   | 93.68(7)   | O(5)-Co(1)-N(1)   | 91.59(7)   |
| O(1)-Co(1)-N(1)     | 93.68(7)   | N(1)#2-Co(1)-N(1) | 94.87(11)  |
| O(5)-Co(1)-O(4)#2   | 85.13(7)   | O(1)-Co(1)-O(4)#2 | 89.42(7)   |
| N(1)#2-Co(1)-O(4)#2 | 86.83(7)   | N(1)-Co(1)-O(4)#2 | 176.35(7)  |
| O(5)-Co(1)-O(4)     | 85.13(7)   | O(1)-Co(1)-O(4)   | 89.42(7)   |
| N(1)#2-Co(1)-O(4)   | 176.35(7)  | N(1)-Co(1)-O(4)   | 86.83(7)   |
| O(4)#2-Co(1)-O(4)   | 91.29(10)  |                   |            |

Symmetry transformations used to generate equivalent atoms: #2 x, -y+1/2, z

Select bond distances (Å) and angles (°) for **9**

|                     |            |                       |            |
|---------------------|------------|-----------------------|------------|
| Co(1)-N(7)          | 2.093(2)   | Co(1)-N(7)#1          | 2.093(2)   |
| Co(1)-N(1)          | 2.158(3)   | Co(1)-N(1)#1          | 2.158(3)   |
| Co(1)-N(6)#1        | 2.1375(18) | Co(1)-N(6)            | 2.1375(18) |
| N(7)-Co(1)-N(7)#1   | 180.000(1) | N(7) #1-Co(1)-N(6) #1 | 89.86(13)  |
| N(7) -Co(1)-N(6)#1  | 90.14(13)  | N(7)#1-Co(1)-N(6)     | 90.14(13)  |
| N(7) -Co(1)-N(6)    | 89.86(13)  | N(6)#1-Co(1)-N(6)     | 180.000(1) |
| N(7)#1-Co(1)-N(1)   | 91.12(12)  | N(7)-Co(1)-N(1)       | 88.88(12)  |
| N(6)#1-Co(1)-N(1)   | 86.83(11)  | N(6)-Co(1)-N(1)       | 93.17(11)  |
| N(7)#1-Co(1)-N(1)#1 | 88.88(12)  | N(7)-Co(1)-N(1) #1    | 91.12(12)  |
| N(6)#1-Co(1)-N(1)#1 | 93.17(11)  | N(6)-Co(1)-N(1)#1     | 86.83(11)  |
| N(1)-Co(1)-N(1)#1   | 180.00(16) |                       |            |

Symmetry transformations used to generate equivalent atoms: #1 2-x, -y, 2-z

Select bond distances (Å) and angles (°) for **10**

|                     |            |                     |            |
|---------------------|------------|---------------------|------------|
| Co(1)-O(1)#4        | 2.0801(16) | Co(1)-O(1)          | 2.0801(16) |
| Co(1)-N(1)#4        | 2.161(2)   | Co(1)-N(1)          | 2.161(2)   |
| Co(1)-N(7)          | 2.167(2)   | Co(1)-N(7)#4        | 2.167(2)   |
| Co(2)-O(6)          | 2.088(2)   | Co(2)-O(6)#5        | 2.088(2)   |
| Co(2)-O(3)#5        | 2.1273(18) | Co(2)-O(3)          | 2.1273(18) |
| Co(2)-N(5)#5        | 2.136(3)   | Co(2)-N(5)          | 2.136(3)   |
| O(1)#4-Co(1)-O(1)   | 180.000(1) | O(1)#4-Co(1)-N(1)#4 | 94.23(7)   |
| O(1)-Co(1)-N(1)#4   | 85.77(7)   | O(1)#4-Co(1)-N(1)   | 85.77(7)   |
| O(1)-Co(1)-N(1)     | 94.23(7)   | N(1)#4-Co(1)-N(1)   | 180.000(1) |
| O(1)#4-Co(1)-N(7)   | 93.43(7)   | O(1)-Co(1)-N(7)     | 86.57(7)   |
| N(1)#4-Co(1)-N(7)   | 93.46(8)   | N(1)-Co(1)-N(7)     | 86.54(8)   |
| O(1)#4-Co(1)-N(7)#4 | 86.57(7)   | O(1)-Co(1)-N(7)#4   | 93.43(7)   |
| N(1)#4-Co(1)-N(7)#4 | 86.54(8)   | N(1)-Co(1)-N(7)#4   | 93.46(8)   |

|                     |           |                     |            |
|---------------------|-----------|---------------------|------------|
| N(7)-Co(1)-N(7)#4   | 180.0     | O(6)-Co(2)-O(6)#5   | 180.000(1) |
| O(6)-Co(2)-O(3)#5   | 88.87(8)  | O(6)#5-Co(2)-O(3)#5 | 91.13(8)   |
| O(6)-Co(2)-O(3)     | 91.13(8)  | O(6)#5-Co(2)-O(3)   | 88.87(8)   |
| O(3)#5-Co(2)-O(3)   | 180.0     | O(6)-Co(2)-N(5)#5   | 88.45(10)  |
| O(6)#5-Co(2)-N(5)#5 | 91.55(10) | O(3)#5-Co(2)-N(5)#5 | 87.18(9)   |
| O(3)-Co(2)-N(5)#5   | 92.82(9)  | O(6)-Co(2)-N(5)     | 91.55(10)  |
| O(6)#5-Co(2)-N(5)   | 88.45(10) | O(3)#5-Co(2)-N(5)   | 92.82(9)   |
| O(3)-Co(2)-N(5)     | 87.18(9)  | N(5)#5-Co(2)-N(5)   | 180.000(1) |

Symmetry transformations used to generate equivalent atoms: #4 -x,-y,-z+2; #5 -x,-y+1,-z+1

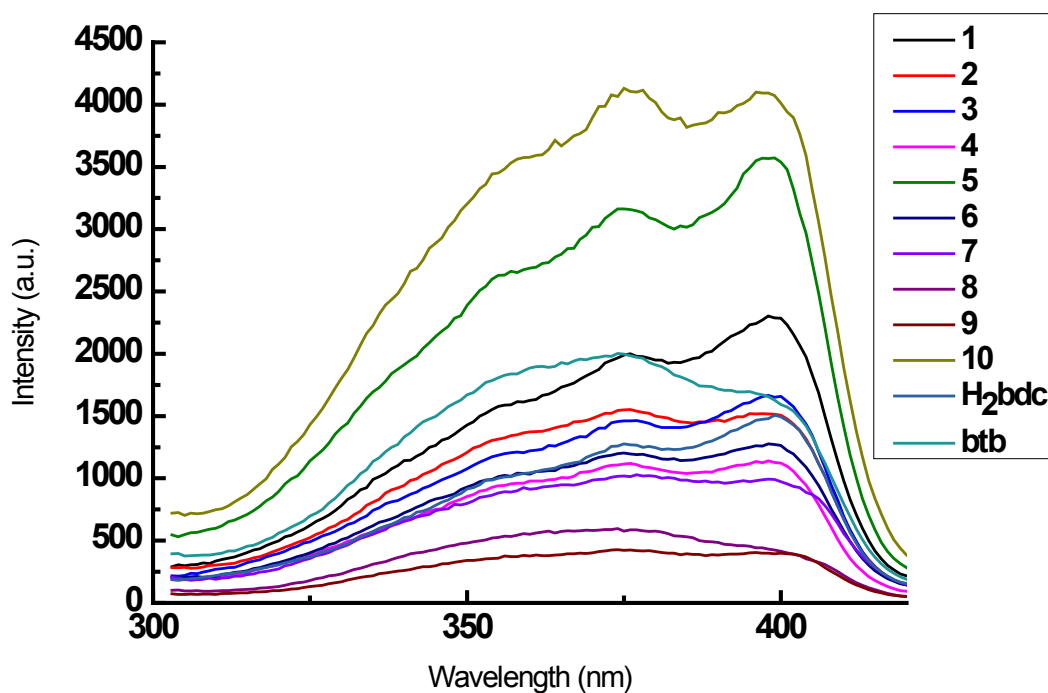

Fig. S1 The excitation spectra of the complexes and free ligands in solid state at room temperature. The excitation spectra were measured at the emission ( $\lambda_{\text{max}}$ , 433 nm for btb, 431 nm for H<sub>2</sub>bdc, 430 nm for **1**, 430 nm for **2**, 431 nm for **3**, 430 nm for **4**, 429 nm for **5**, 431 nm for **6**, 432 nm for **7**, 430 nm for **8**, 430 nm for **9** and 431 nm for **10**).
